# Supplementary material for: Mass balance and metabolite profiling of 14C-guadecitabine in patients with advanced cancer
Source: Springer Nature journal article supplement (doi:10.1007/s10637-019-00854-9), 2019-10-11

## Supplementary Tables and Figures

**Supplementary Table 1.** HPLC and mass spectrometry settings of the Orbitrap high resolution mass spectrometry system and the QTRAP 5500 LC-MS/MS system

**Supplementary Table 2.** Radioactive recovery in urine and feces after subcutaneous administration of  $^{14}\text{C}$ -guadecitabine from 0-48h and up to the last point of collection

**Supplementary Table 3.** Summary of pharmacokinetic parameters of guadecitabine and  $\beta$ -decitabine in plasma on Day 1 and Day 5 after subcutaneous administration of guadecitabine at a dose of 45 mg/m<sup>2</sup>

**Supplementary Table 4.** Proposed metabolite structures and fragmentation patterns of identified metabolites in urine using Orbitrap accurate mass analysis

**Supplementary Table 5.** Cumulative recovery of guadecitabine metabolites in urine (mean  $\pm$  SD) from 0-24h and 0-48h, based on total radioactivity measurements following administration of subcutaneous  $^{14}\text{C}$ -guadecitabine at a dose of 45 mg/m<sup>2</sup> (n=5)

**Supplementary Figure 1.** Multiple reaction monitoring chromatograms of a patient urine sample collected approximately **(A)** 4 h, and **(B)** 48 h after administration of subcutaneous guadecitabine 45 mg/m<sup>2</sup> monitoring **(A, B)** decitabine ( ———  $m/z$  229.1  $\rightarrow$  113.1) and **(C, D)** decitabine-IS ( - - - - -  $m/z$  235.1  $\rightarrow$  119.1) mass transitions.

Supplementary Table 1.

| <b>Pump</b>                            | <b>LC-10AD (Shimadzu)</b>                                                                                           |                               | <b>Acquity I Class (Waters)</b>                                                                                     |                                                                |                                                                              |
|----------------------------------------|---------------------------------------------------------------------------------------------------------------------|-------------------------------|---------------------------------------------------------------------------------------------------------------------|----------------------------------------------------------------|------------------------------------------------------------------------------|
| <b>Flow rate</b>                       | 1.0 mL/min                                                                                                          |                               | 1.0 mL/min                                                                                                          |                                                                |                                                                              |
| <b>Analytical column</b>               | Luna NH2 (250 x 4.6 mm, 5 µm)                                                                                       |                               | Luna NH2 (250 x 4.6 mm, 5 µm)                                                                                       |                                                                |                                                                              |
| <b>Column oven</b>                     | 35 °C                                                                                                               |                               | Acquity I Class (Waters)                                                                                            |                                                                |                                                                              |
| <b>Run time</b>                        | 60 min                                                                                                              |                               | 60 min                                                                                                              |                                                                |                                                                              |
| <b>Mobile phase A</b>                  | IPA: 1M ammonium formate, pH 3.0: ACN (12:0.24:88, v/v/v)                                                           |                               | IPA: 1M ammonium formate, pH 3.0: ACN (12:0.24:88, v/v/v)                                                           |                                                                |                                                                              |
| <b>Mobile phase B</b>                  | IPA: 1M ammonium formate, pH 3.0: ACN (49:1:50, v/v/v)                                                              |                               | IPA: 1M ammonium formate, pH 3.0: ACN (49:1:50, v/v/v)                                                              |                                                                |                                                                              |
| <b>Gradient composition</b>            | Mobile phase B: 20% (0-3 min), 20% → 100% (3-28 min), 100% (28-55 min), 100% → 20% (55-55.1 min), 20% (55.1-60 min) |                               | Mobile phase B: 20% (0-3 min), 20% → 100% (3-28 min), 100% (28-55 min), 100% → 20% (55-55.1 min), 20% (55.1-60 min) |                                                                |                                                                              |
| <b>Autosampler</b>                     | <b>SIL HTc (Shimadzu)</b>                                                                                           |                               | <b>Acquity I Class (Waters)</b>                                                                                     |                                                                |                                                                              |
| <b>Tray temperature</b>                | 15 °C                                                                                                               |                               | 5 ± 3 °C                                                                                                            |                                                                |                                                                              |
| <b>Injection volume</b>                | 50 µL                                                                                                               |                               | 10 µL                                                                                                               |                                                                |                                                                              |
| <b>Splitter</b>                        | <b>Accurate (LC packings)</b>                                                                                       |                               | <b>Accurate (LC packings)</b>                                                                                       |                                                                |                                                                              |
| <b>Split ratio (collector:MS)</b>      | 3:1 (v/v)                                                                                                           |                               | 3:1 (v/v)                                                                                                           |                                                                |                                                                              |
| <b>Mass spectrometer</b>               | <b>LTQ Orbitrap (Thermo)</b>                                                                                        |                               | <b>QTRAP 5500 (AB Sciex)</b>                                                                                        |                                                                |                                                                              |
| <b>Ionization/interface</b>            | ESI, positive ionization mode                                                                                       | ESI, negative ionization mode | <b>Ionization/interface</b>                                                                                         | ESI, positive ionization mode                                  | ESI, negative ionization mode                                                |
| <b>Scan range (m/z)</b>                | 50-1000                                                                                                             | 50-1000                       | <b>Monitored transitions (m/z)</b>                                                                                  | 558.1 → 446.0 (SGI-110), 229.1 → 113.0 (DEC), 219 → 103.0 (M5) | 128.0 → 85.0 (M1), 244.1 → 85.0 (M2), 246.1 → 129.0 (M3), 218.0 → 102.0 (M4) |
| <b>Monitored transitions (m/z)</b>     | NA                                                                                                                  | NA                            | <b>Ionspray voltage (V)</b>                                                                                         | 5500                                                           | -4500                                                                        |
| <b>Sheath gas flow (au)</b>            | 25                                                                                                                  | 25                            | <b>Ion source gas 1 (au)</b>                                                                                        | 50                                                             | 50                                                                           |
| <b>Aux gas flow (au)</b>               | 5                                                                                                                   | 5                             | <b>Ion source gas 2 (au)</b>                                                                                        | 50                                                             | 50                                                                           |
| <b>Sweep gas flow (au)</b>             | 2                                                                                                                   | 2                             | <b>Curtain gas (au)</b>                                                                                             | 30                                                             | 30                                                                           |
| <b>Spray voltage (kV)</b>              | 3.5                                                                                                                 | 5                             | <b>Collision gas (au)</b>                                                                                           | 8                                                              | 8                                                                            |
| <b>Normalized collision energy (V)</b> | 35                                                                                                                  | 40                            | <b>Temperature (°C)</b>                                                                                             | 400                                                            | 400                                                                          |
| <b>Capillary temperature (°C)</b>      | 300                                                                                                                 | 350                           | <b>Dwell time (ms)</b>                                                                                              | 30                                                             | 30                                                                           |
| <b>Capillary voltage (V)</b>           | 35                                                                                                                  | -22                           | <b>Collision energy (V)</b>                                                                                         | 20                                                             | -20                                                                          |
| <b>Tube lens (V)</b>                   | 52                                                                                                                  | -43                           | <b>Collision exit potential (V)</b>                                                                                 | 10                                                             | -10                                                                          |
|                                        |                                                                                                                     |                               | <b>Declustering potential (V)</b>                                                                                   | 125                                                            | -125                                                                         |

**Supplementary Table 2.**

| <b>Patient<br/>(#)</b> | <b>0-48 h</b>        |                      |                      | <b>Up to the last point of<br/>collection</b> |                      |                      |                                  |
|------------------------|----------------------|----------------------|----------------------|-----------------------------------------------|----------------------|----------------------|----------------------------------|
|                        | <b>Urine<br/>(%)</b> | <b>Feces<br/>(%)</b> | <b>Total<br/>(%)</b> | <b>Urine<br/>(%)</b>                          | <b>Feces<br/>(%)</b> | <b>Total<br/>(%)</b> | <b>Collection<br/>period (h)</b> |
| <b>1</b>               | 72.3                 | 0.0                  | 72.3                 | 77.4                                          | 0.3                  | 77.6                 | 144                              |
| <b>2</b>               | 91.3                 | 0.0                  | 91.3                 | 95.5                                          | 0.4                  | 95.8                 | 144                              |
| <b>3</b>               | 82.1                 | 0.2                  | 82.4                 | 86.6                                          | 0.5                  | 87.1                 | 144                              |
| <b>4</b>               | 95.6                 | 0.2                  | 95.7                 | 98.2                                          | 0.2                  | 98.4                 | 72                               |
| <b>5</b>               | 92.2                 | 0.2                  | 92.4                 | 93.2                                          | 0.4                  | 93.6                 | 72                               |
| <b>Mean</b>            | 86.7                 | 0.1                  | 86.8                 | 90.2                                          | 0.4                  | 90.5                 | NA                               |
| <b>SD</b>              | 8.5                  | 0.1                  | 8.5                  | 7.5                                           | 0.1                  | 7.4                  | NA                               |

Supplementary Table 3.

| Parameter                                |        | Guadecitabine<br>Day 1 (n=5) | Guadecitabine<br>Day 5 (n=5) | β-decitabine Day<br>1 (n=5) | β-decitabine Day<br>5 (n=5) |
|------------------------------------------|--------|------------------------------|------------------------------|-----------------------------|-----------------------------|
| <b>C<sub>max</sub> (ng/mL)</b>           | Mean   | 108                          | 165                          | 42.9                        | 51.4                        |
|                                          | CV (%) | 43.6                         | 46.1                         | 35.1                        | 28.4                        |
| <b>T<sub>max</sub> (h)</b>               | Mean   | 1.85                         | 0.90                         | 2.05                        | 1.80                        |
|                                          | CV (%) | 75.0                         | 24.8                         | 61.2                        | 31.7                        |
| <b>AUC<sub>0-last</sub> (ng·h/mL)</b>    | Mean   | 245                          | 269                          | 130                         | 134                         |
|                                          | CV (%) | 22.0                         | 28.7                         | 31.7                        | 22.0                        |
| <b>AUC<sub>0-inf</sub> (ng·h/mL)</b>     | Mean   | 249                          | 275                          | 135                         | 136                         |
|                                          | CV (%) | 22.0                         | 26.4                         | 33.0                        | 21.9                        |
| <b>t<sub>1/2</sub> (h)</b>               | Mean   | 0.78                         | 0.67                         | 1.12                        | 0.95                        |
|                                          | CV (%) | 37.8                         | 36.8                         | 30.4                        | 7.39                        |
| <b>k<sub>e</sub> (h<sup>-1</sup>)</b>    | Mean   | 1.04                         | 1.14                         | 0.68                        | 0.73                        |
|                                          | CV (%) | 48.3                         | 35.7                         | 34.2                        | 7.91                        |
| <b>V<sub>z</sub>/F (L/m<sup>2</sup>)</b> | Mean   | 204                          | 172                          | NA                          | NA                          |
|                                          | CV (%) | 31.8                         | 49.7                         | NA                          | NA                          |
| <b>CL/F (L/h/m<sup>2</sup>)</b>          | Mean   | 189                          | 172                          | NA                          | NA                          |
|                                          | CV (%) | 26.6                         | 23.8                         | NA                          | NA                          |

NA Not applicable  
*AUC<sub>0-inf</sub>* Area under the plasma concentration-time curve from time 0 to infinity, *AUC<sub>0-last</sub>* Area under the plasma concentration-time curve from time 0 to the last quantifiable concentration, *CL/F* Apparent oral clearance, *C<sub>max</sub>* maximum observed plasma concentration, *CV* Coefficient of variation, *T<sub>max</sub>* time to reach maximum observed plasma concentration, *t<sub>1/2</sub>* terminal half-life, *V<sub>z</sub>/F* Apparent volume of distribution during terminal phase

Supplementary Table 4.

| Metabolite | Proposed structure and fragmentation                                                                                                                        | Retention time (min) | MS              | Theoretical monoisotopic ion mass (Da) | Measured monoisotopic ion mass (Da) | $\Delta$ ppm |
|------------|-------------------------------------------------------------------------------------------------------------------------------------------------------------|----------------------|-----------------|----------------------------------------|-------------------------------------|--------------|
| <b>M1</b>  | <p><i>m/z</i> 85.00</p> 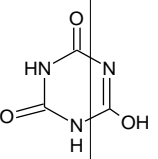                                                   | 14-16                | MS              | 128.01016                              | 128.01019                           | 0.234356     |
|            |                                                                                                                                                             |                      | MS <sup>2</sup> | 85.00435                               | 85.00456                            | 2.470462     |
| <b>M2</b>  | <p><i>m/z</i> 201.05</p> <p><i>m/z</i> 160.06</p>                          | 10.5-12.5            | MS              | 244.05751                              | 244.05733                           | -0.737531    |
|            |                                                                                                                                                             |                      | MS <sup>2</sup> | 201.05169                              | 201.05139                           | -1.492154    |
|            |                                                                                                                                                             |                      | MS <sup>2</sup> | 160.06153                              | 160.06157                           | 0.249904     |
| <b>M3</b>  |  <p><i>m/z</i> 74.02</p> <p><i>m/z</i> 87.02</p> <p><i>m/z</i> 127.05</p> | 14-16                | MS              | 246.07316                              | 246.07290                           | -1.056596    |
|            |                                                                                                                                                             |                      | MS <sup>2</sup> | 127.05130                              | 127.05122                           | -0.629667    |
|            |                                                                                                                                                             |                      | MS <sup>2</sup> | 87.02000                               | 87.02008                            | 0.919329     |
|            |                                                                                                                                                             |                      | MS <sup>3</sup> | 74.02475                               | 74.02493                            | 2.431619     |

|           |                                                                                   |       |                 |           |           |           |
|-----------|-----------------------------------------------------------------------------------|-------|-----------------|-----------|-----------|-----------|
| <b>M4</b> | 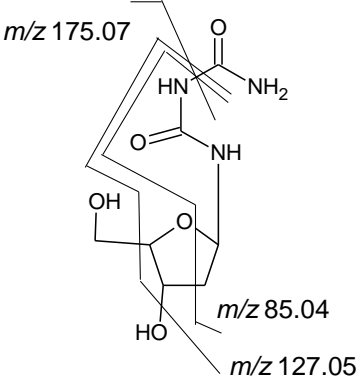 | 16-20 | MS              | 218.07824 | 218.07828 | 0.183420  |
|           |                                                                                   |       | MS <sup>2</sup> | 175.07243 | 175.07228 | -0.856788 |
|           |                                                                                   |       | MS <sup>3</sup> | 85.04074  | 85.04095  | 2.469405  |
|           |                                                                                   |       | MS <sup>3</sup> | 127.05130 | 127.05129 | -0.078708 |
| <b>M5</b> |  | 25-35 | MS              | 219.10878 | 219.10840 | -1.734298 |
|           |                                                                                   |       | MS <sup>2</sup> | 175.07243 | 175.07228 | -0.856788 |
|           |                                                                                   |       | MS <sup>3</sup> | 85.04074  | 85.04095  | 2.469405  |
|           |                                                                                   |       | MS <sup>3</sup> | 127.05130 | 127.05129 | -0.078708 |

**Supplementary Table 5.**

| <b>Metabolite</b>          | <b>% of administered dose</b> |                    |
|----------------------------|-------------------------------|--------------------|
|                            | <i>0-24h</i>                  | <i>0-48h</i>       |
| <b>M1</b>                  | 19.6 (3.8)                    | 20.9 (3.7)         |
| <b>M2</b>                  | 14.0 (6.8)                    | 14.3 (6.8)         |
| <b>M3/4</b>                | 23.0 (4.0)                    | 26.2 (3.3)         |
| <b>M5</b>                  | 11.8 (3.4)                    | 13.9 (3.6)         |
| <b>Total of M1-M5</b>      | <b>68.3 (14.1)</b>            | <b>75.3 (12.5)</b> |
| <b>Total radioactivity</b> | <b>77.3 (11.6)</b>            | <b>86.7 (9.5)</b>  |

### Supplementary Figure 1.

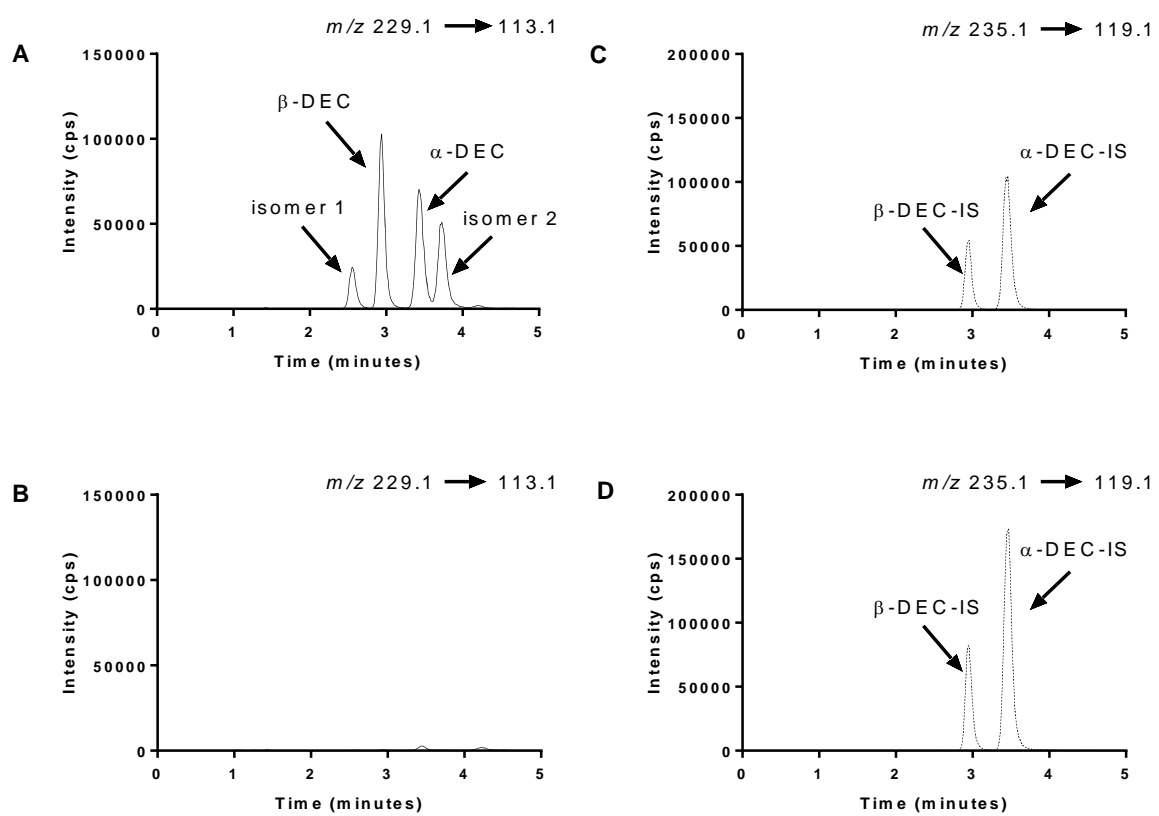

Supplement: MOESM1 [file 17264706]
